# Supplementary material
Source: Springer Nature journal article supplement (https://www.springermedizin.de/resource/supplementary/12939_2010_225_MOESM1_ESM.pdf/9550640)
Supplement: MOESM1 [file 9550640]

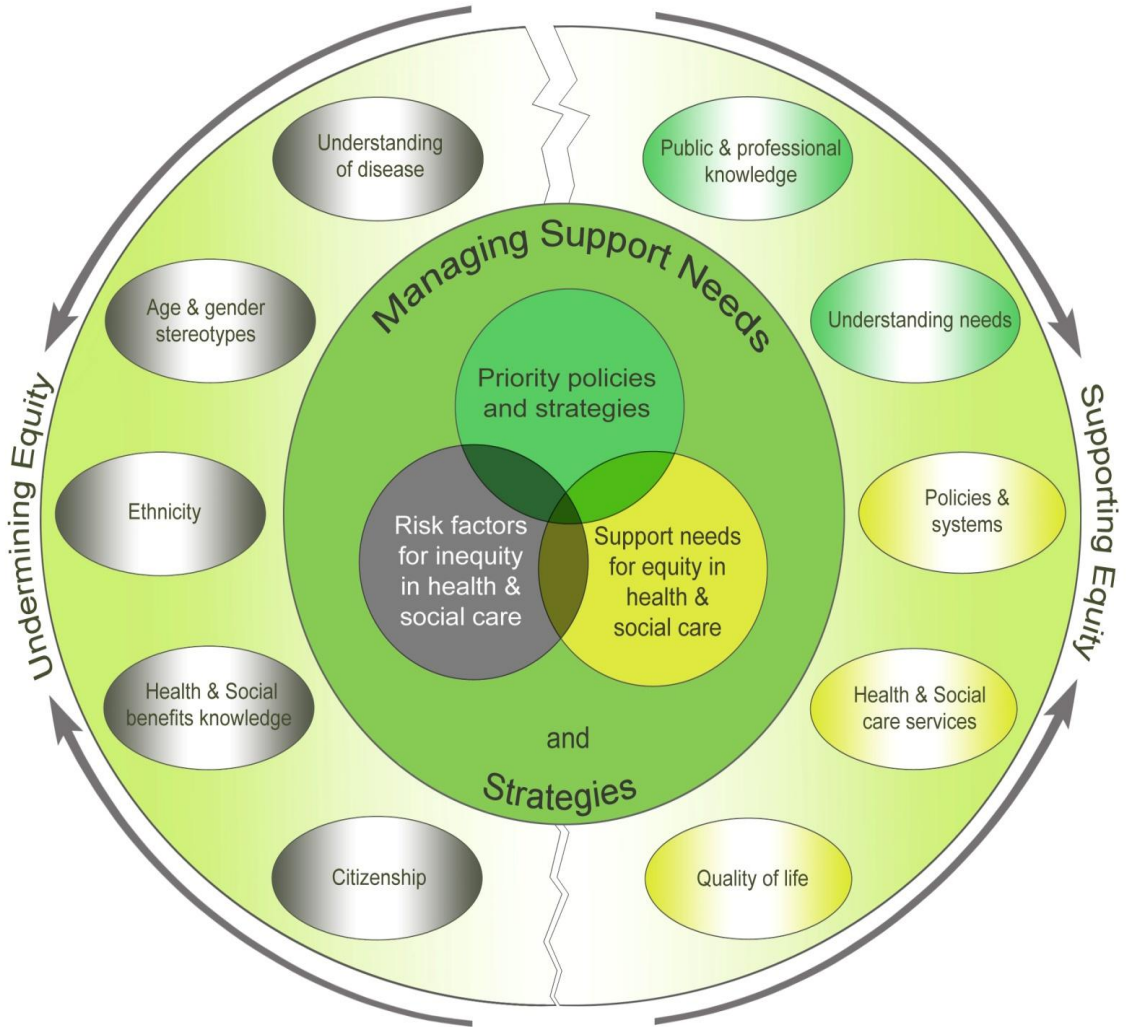

# Managing Support Needs

Priority policies and strategies

Risk factors for inequity in health & social care

Support needs for equity in health & social care

# and Strategies

Understanding of disease

Public & professional knowledge

Age & gender stereotypes

Understanding needs

Ethnicity

Policies & systems

Health & Social benefits knowledge

Health & Social care services

Citizenship

Quality of life

Undermining Equity

Supporting Equity
